# Supplementary material for: Gelatin-Based Electrospun Nanofibers Cross-Linked Using Horseradish Peroxidase for Plasmid DNA Delivery
Source: MDPI journal article supplement (doi:10.3390/biom12111638), 2022-11-04
Supplement: s1 [file s1]

Supplementary

**Gelatin-based Electrospun Nanofibers Cross-linked using  
Horseradish Peroxidase for Plasmid DNA Delivery**

*Kotoko Furuno<sup>a</sup>, Keiichiro Suzuki<sup>a, b, c</sup> and Shinji Sakai<sup>a</sup>*

<sup>a</sup>Department of Materials Engineering Science, Graduate School of Engineering  
Science, Osaka University, 1-3 Machikaneyama-cho, Toyonaka, Osaka 560-8531,  
Japan

<sup>b</sup>Institute for Advanced Co-Creation Studies, Osaka University, 1-3  
Machikaneyama-cho, Toyonaka, Osaka 560-8531, Japan

<sup>c</sup>Graduate School of Frontier Bioscience, Osaka University, 1-3 Yamadaoka,  
Suita, Osaka 565-0871, Japan

Number of pages: 2

Number of figures: 2

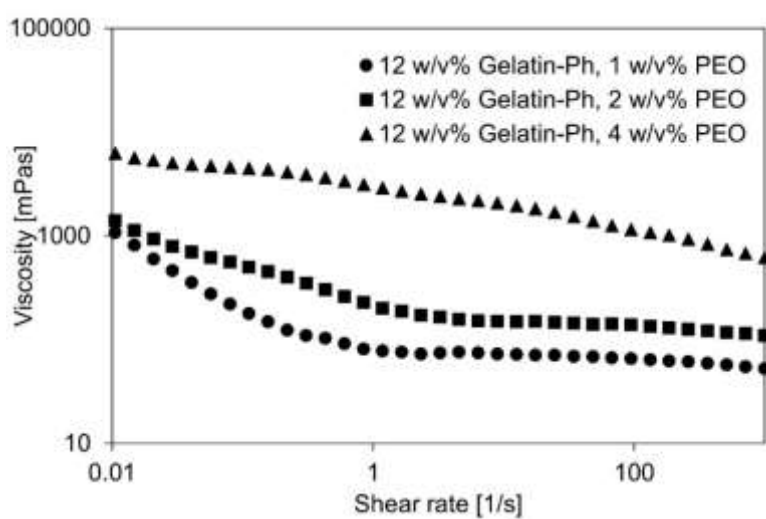

**Figure S1** Viscosity of the solutions. The solutions contained 12 w/v% Gelatin-Ph and 2, 4, or 8 w/v% PEO.

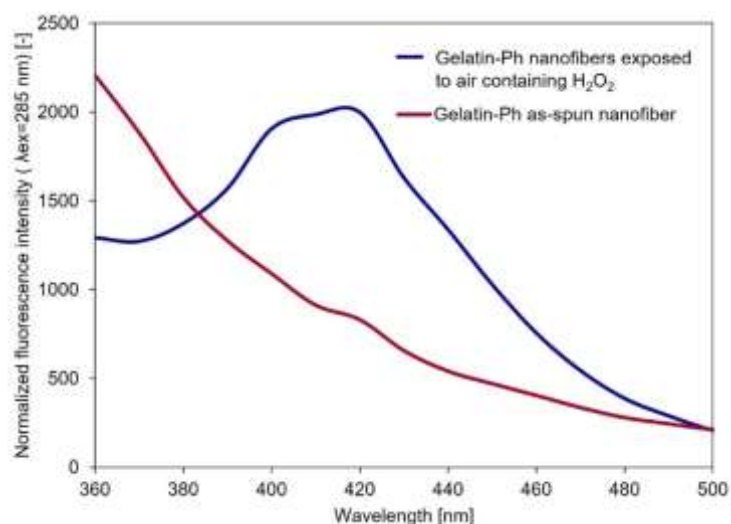

**Figure S2** Fluorescence intensity of Gelatin-Ph nanofibers exposed to air containing  $\text{H}_2\text{O}_2$  and Gelatin-Ph as-spun nanofibers. The fluorescence attributed to dityrosine (400–420 nm) was monitored with excitation wavelength of 285 nm.
